# Supplementary material
Source: PubMed Central journal article supplement (PMC3131046)
Supplement: supp_ddr209_ddr209supp.pdf [file supp_ddr209_ddr209supp.pdf]

**Supplementary Material****Biochemical analysis of human *POLG2* variants associated with mitochondrial disease**

**Matthew J. Young, Matthew J. Longley, Fang-Yuan Li, Rajesh Kasiviswanathan, Lee-Jun Wong, and William C. Copeland**

**Supplementary Table: *POLG2* sequencing primers.** Primer sequences were designed using genomic sequence from the Genbank database. All primers are M13 linked.

| <b>Exons</b> | <b>Primer Names</b> | <b>Primer Sequences (5'-3')</b>                            | <b>Length</b> |
|--------------|---------------------|------------------------------------------------------------|---------------|
| E1           | POLG2-E1F2          | CTC GT TGT AAA ACG ACG GCC AGT<br>AACGGTAGTGGTGGCTTGTT     | 43            |
|              | POLG2-E1R2          | CTG CT CAG GAA ACA GCT ATG ACC<br>CCAGTTGCAATCCCCAAG       | 41            |
| E2-3         | POLG2-E2-3F         | CTC GT TGT AAA ACG ACG GCC AGT<br>CCACCAAGCTTAGCCAACAT     | 43            |
|              | POLG2-E2-3F3        | CTC GT TGT AAA ACG ACG GCC AGT<br>TAGGCGTGAGCCACCAAG       | 41            |
|              | POLG2-E2-3R         | CTG CT CAG GAA ACA GCT ATG ACC<br>ACACATCTGAGCCCAACAAA     | 43            |
| E4           | POLG2-E4F           | CTC GT TGT AAA ACG ACG GCC AGT<br>TGCTGAATAAAAAGTATCGGACAA | 47            |
|              | POLG2-E4R           | CTG CT CAG GAA ACA GCT ATG ACC<br>GGCTCTGTGGCAATAGTGGA     | 43            |
| E5           | POLG2-E5F           | CTC GT TGT AAA ACG ACG GCC AGT<br>CCGTCTCAAAAACAAACAAACA   | 45            |
|              | POLG2-E5R2          | CTG CT CAG GAA ACA GCT ATG ACC<br>AGAAACCGAGCACACTAACATT   | 45            |
| E6           | POLG2-E6F           | CTC GT TGT AAA ACG ACG GCC AGT<br>CTGCCAAACATCTAAGTGGAGA   | 45            |
|              | POLG2-E6R           | CTG CT CAG GAA ACA GCT ATG ACC<br>TGAGTTCAAAGGAAATGCTCA    | 44            |
|              | POLG2-E6R2          | AACTCACCTGTCTTAGTTC                                        | 20            |
| E7           | POLG2-E7F           | CTC GT TGT AAA ACG ACG GCC AGT<br>TTGAAGAGGGTGATTTGTGG     | 43            |
|              | POLG2-E7R           | CTG CT CAG GAA ACA GCT ATG ACC<br>TTCTGTAAAAGGGAAACTGAGGA  | 46            |
| E8           | POLG2-E8F           | CTC GT TGT AAA ACG ACG GCC AGT<br>CCCTGAGTCTGTGACTCTTGA    | 44            |
|              | POLG2-E8R           | CTG CT CAG GAA ACA GCT ATG ACC<br>AATGAAAGCAAGCACCACAA     | 43            |

## Figure Legends

**Figure S1. Determination of the affinities of p55 variants for p140 ( $K_{d(p140)}$ ).** Representative p140-binding isotherms for wild-type and each of the p55 variants. Reactions (50  $\mu$ l) contained 1 nM of p140 and varying amounts (0 – 20 nM) of dimeric p55 or variant at the fixed concentration of 220 mM NaCl. Reaction times were 10 minutes at 37°C. On the Y-axis, pmol dTMP represents the amount of dTMP incorporated into the poly(rA)•oligo(dT)<sub>12-18</sub> (polymerase activity) as measured by counting TCA-insoluble radioactivity. Using the KaleidaGraph program each  $K_{d(p140)}$  value was estimated from the quadratic curve fits by nonlinear regression analysis as described in Materials and Methods. Each version of p55 was measured at least twice and the average  $K_{d(p140)}$  value  $\pm$  the standard deviation is reported in Table 2.

**Figure S2. Determination of the dissociation constants for DNA binding ( $K_{d(DNA)}$ ) of p55 and p55 variants.** Representative DNA-binding isotherms for wild-type and each of the p55 variants. Electrophoretic mobility shift assays were performed to estimate the  $K_{d(DNA)}$  values using various concentrations of p55 or p55 variant (0 – 160 nM dimers) incubated separately with 15 nM of double stranded oligonucleotide in 20  $\mu$ l binding reactions (Materials and Methods). The fraction of DNA bound is plotted against the concentration of p55 or variant dimers and binding isotherms were fit to a quadratic equation by nonlinear regression analysis using the KaleidaGraph program to estimate  $K_{d(DNA)}$  values. Each version of p55 was measured at least twice and the average  $K_{d(DNA)}$  value  $\pm$  the standard deviation is reported in Table 2.

**WT p55**

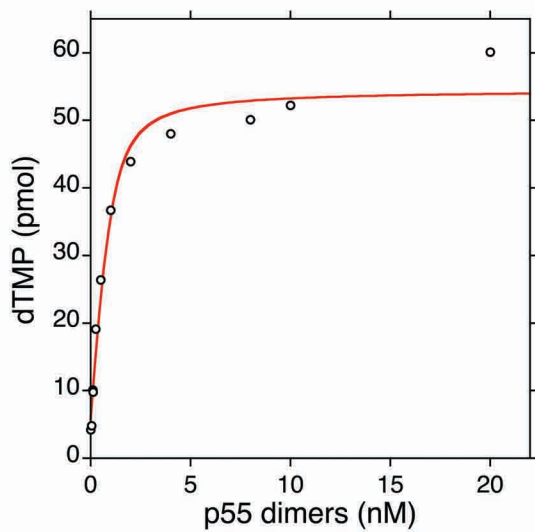

**G103S p55**

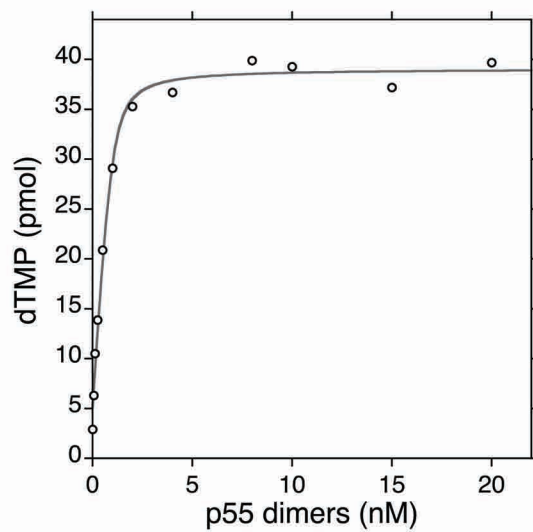

**L153V p55**

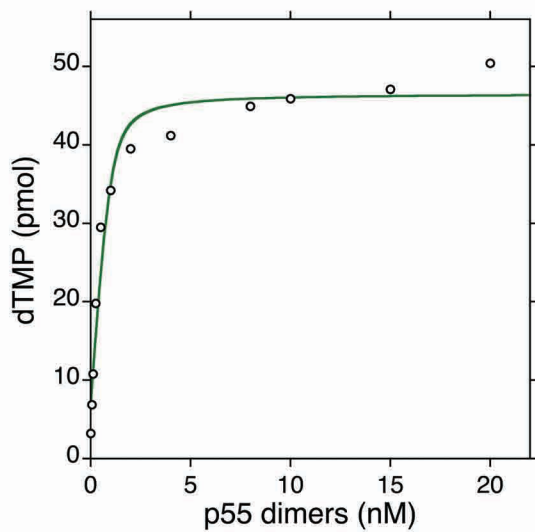

**P205R p55**

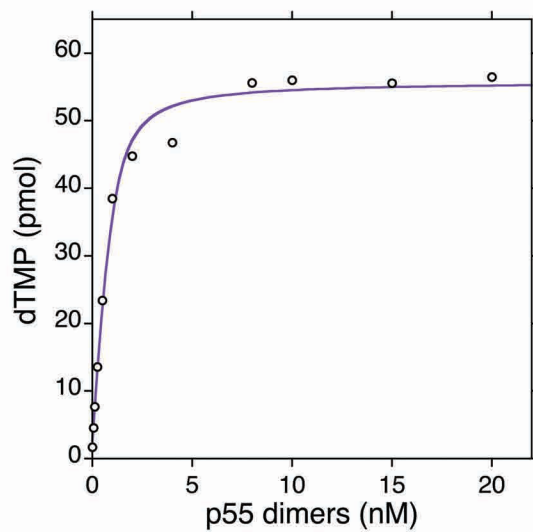

**R369G p55**

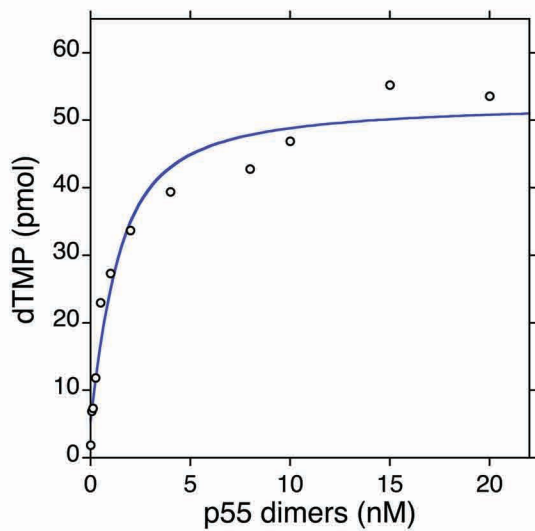

**D386E p55**

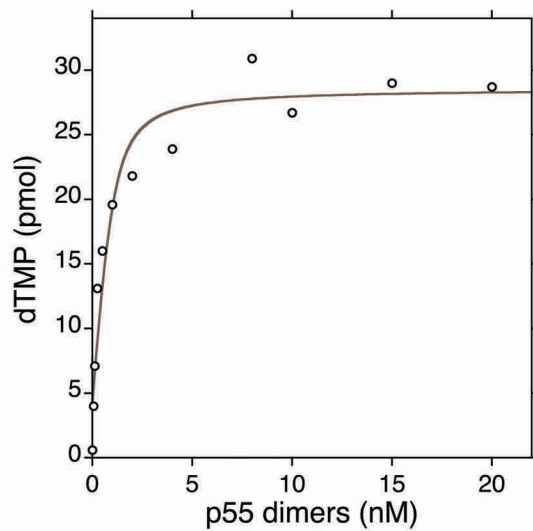

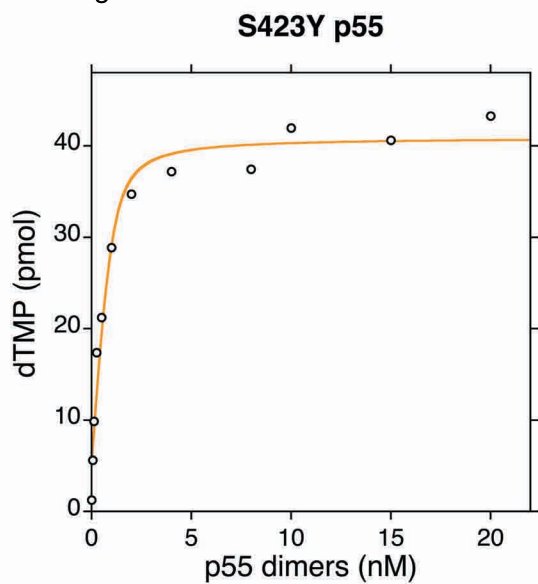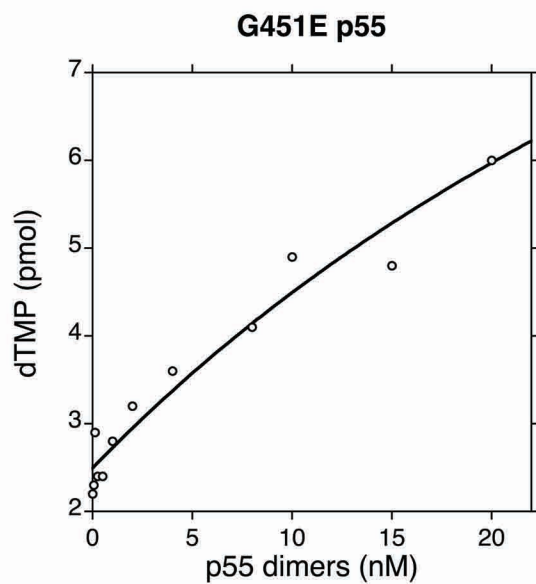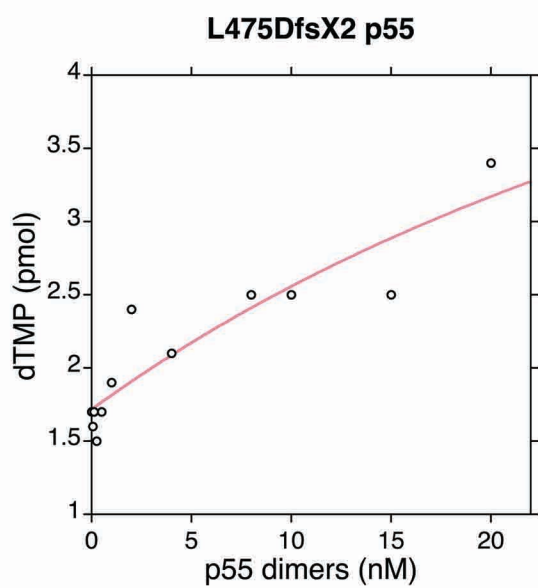

Figure S1.

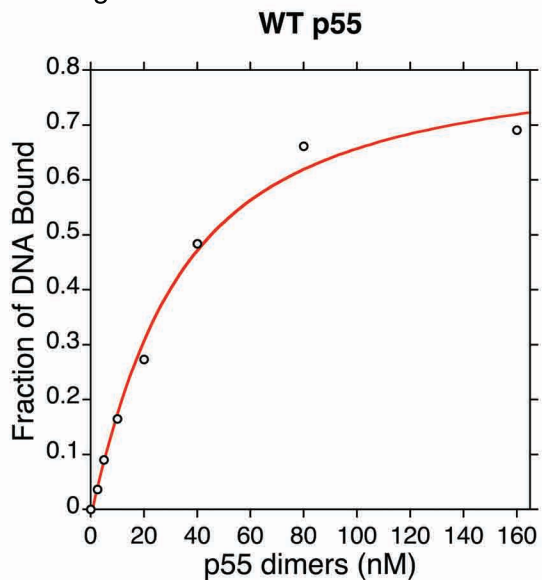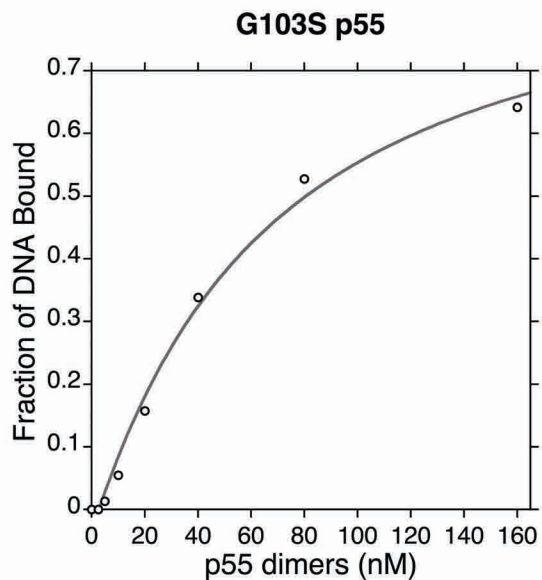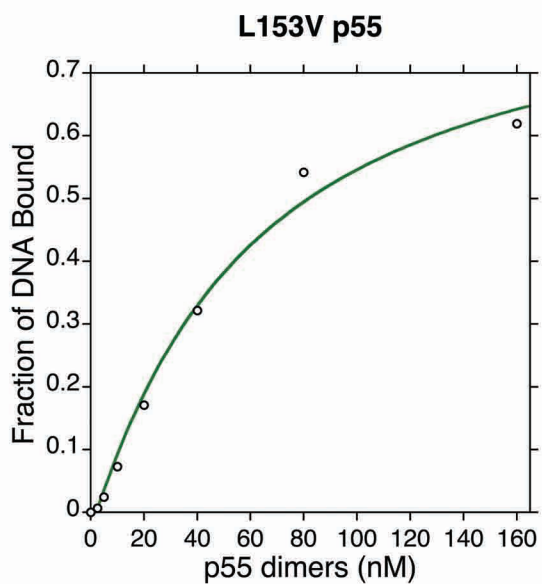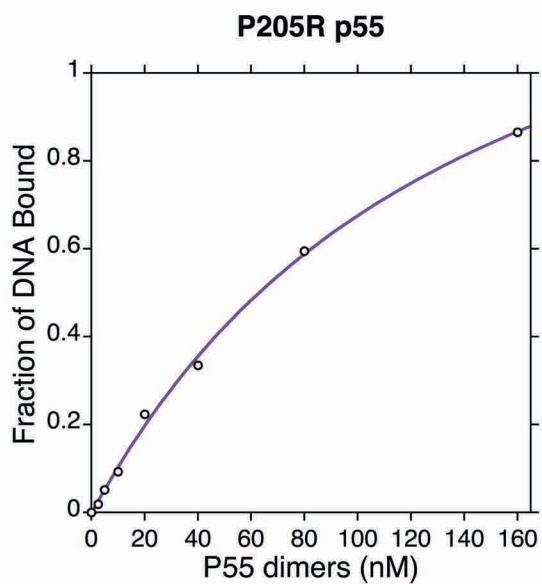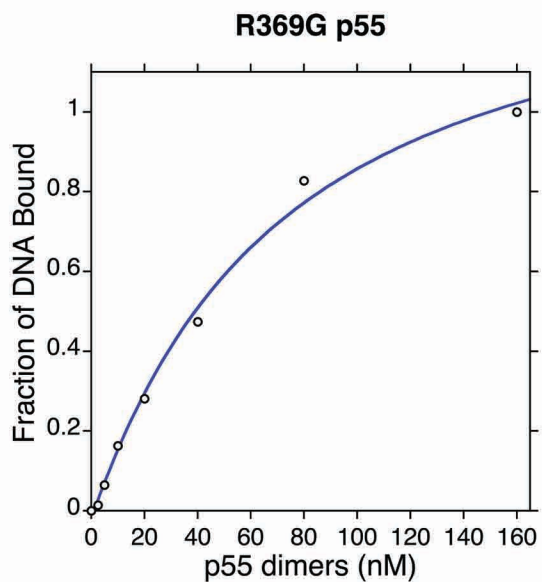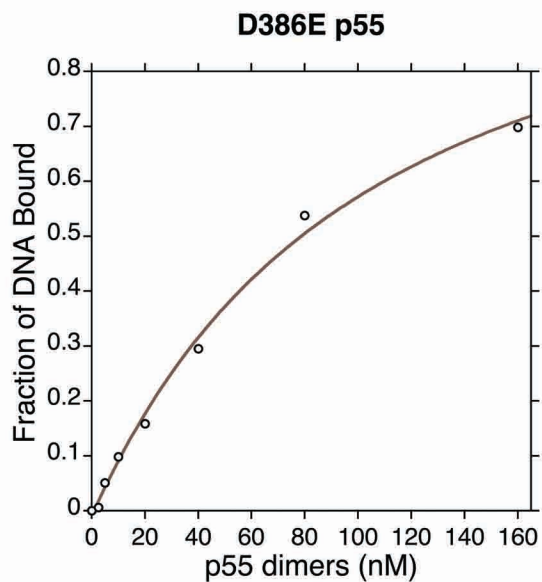

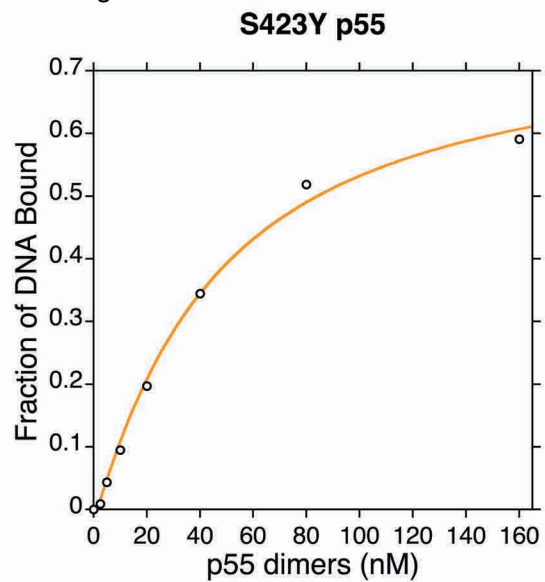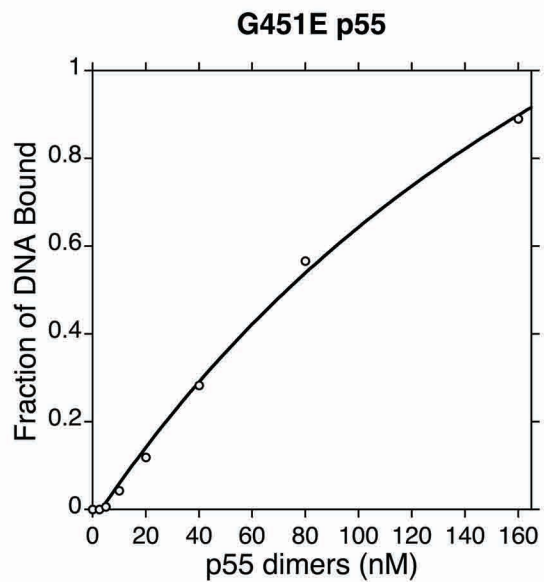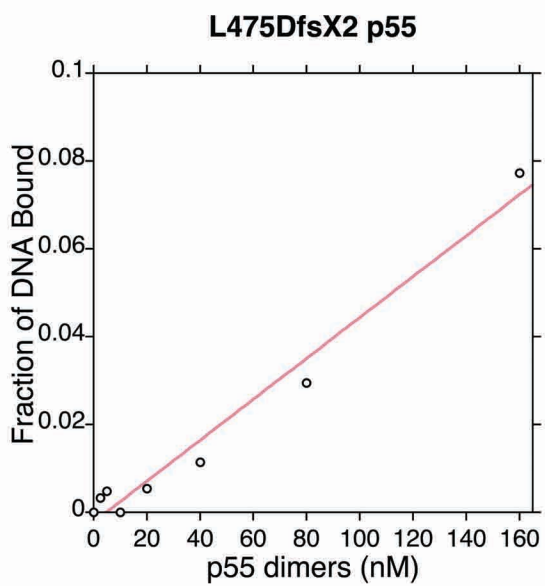

Figure S2.
